# Supplementary material
Source: PubMed Central journal article supplement (PMC8165030)

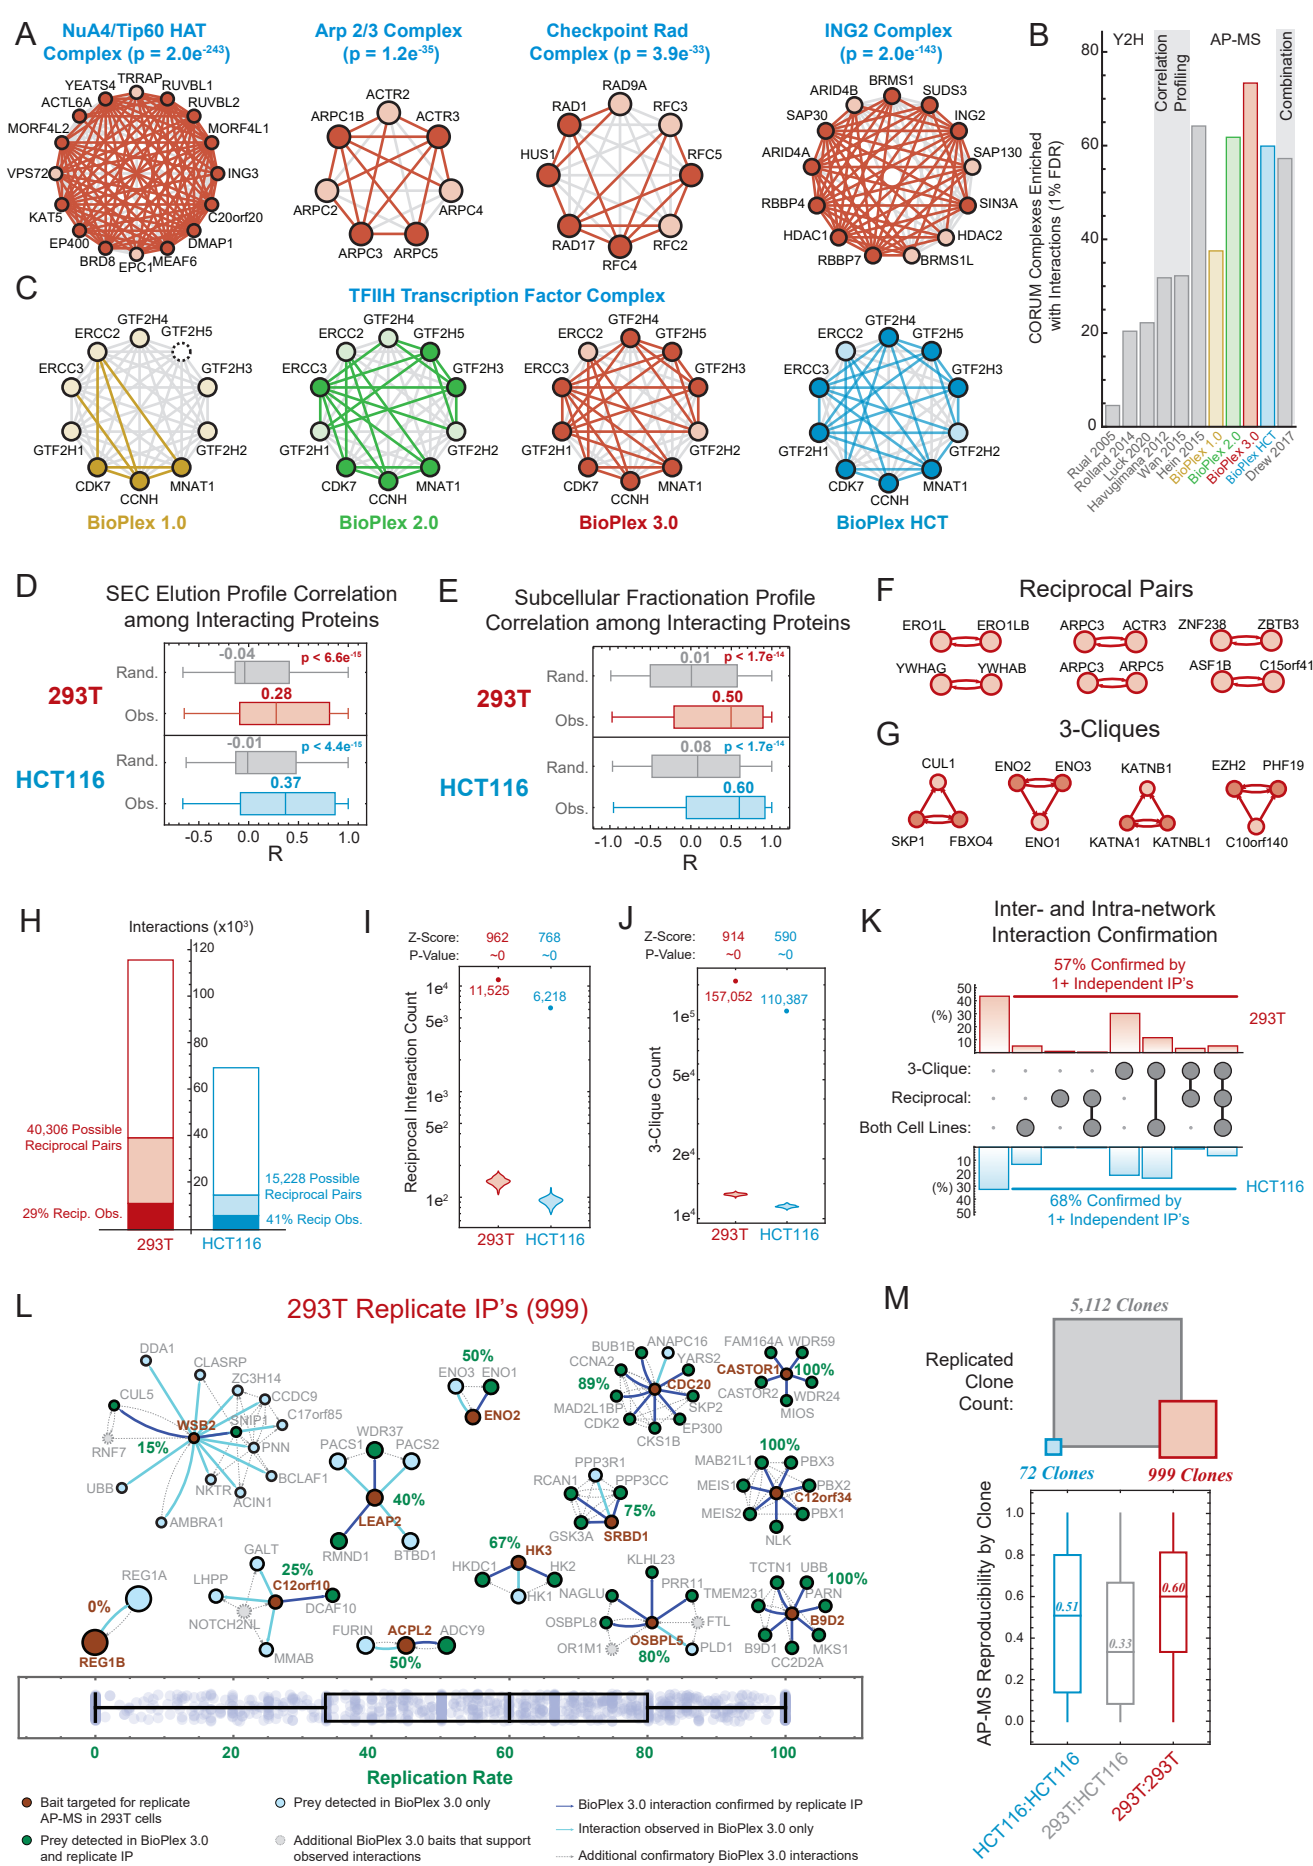

Supplement: NIHMS1699644-supplement-1.pdf [file NIHMS1699644-supplement-1.pdf]
