# Supplementary material
Source: PubMed Central journal article supplement (PMC8165030)
Supplement: NIHMS1699644-supplement-3.pdf [file NIHMS1699644-supplement-3.pdf]

# Cell Line Properties

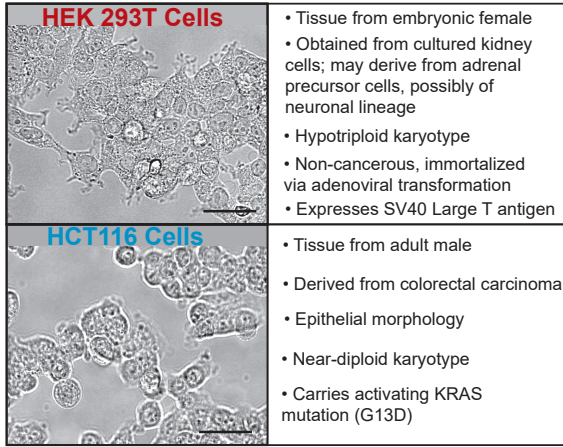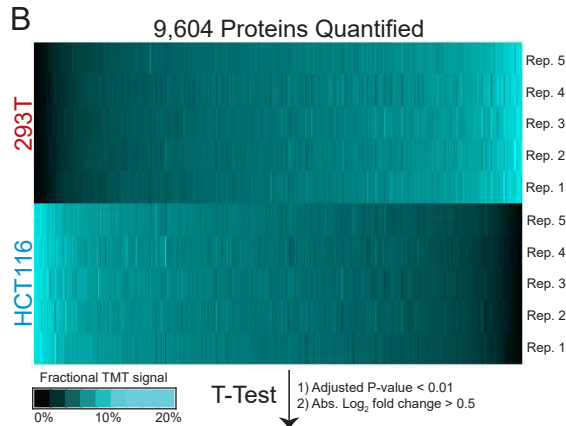

| Elevated in HCT116<br>2,422 Proteins (25%) | Elevated in 293T<br>2,827 Proteins (29%)      |
|--------------------------------------------|-----------------------------------------------|
| BP: Cell Adhesion (3.1e <sup>-11</sup> )   | BP: Nervous System Dev. (5.3e <sup>-7</sup> ) |
| CC: Cell Junction (4.0e <sup>-13</sup> )   | BP: Embryo Dev. (1.3e <sup>-4</sup> )         |
| CC: Plasma Membrane (4.0e <sup>-13</sup> ) | CC: Ciliary Tip (4.8e <sup>-7</sup> )         |
| MF: Cadherin Binding (4.3e <sup>-5</sup> ) | CC: Condensin Complex (3.6e <sup>-3</sup> )   |
|                                            | MF: Spectrin Binding (4.8e <sup>-4</sup> )    |

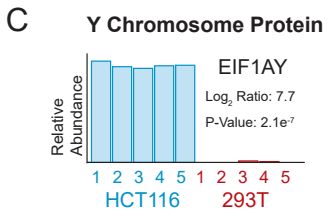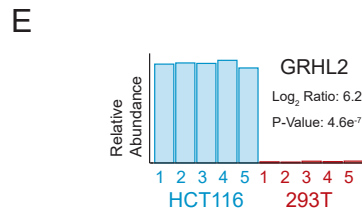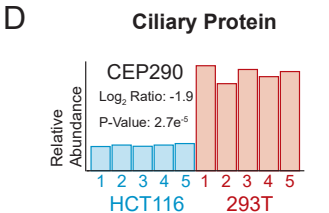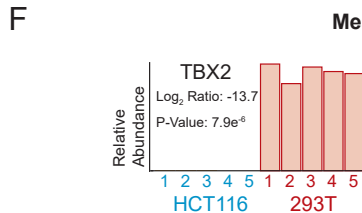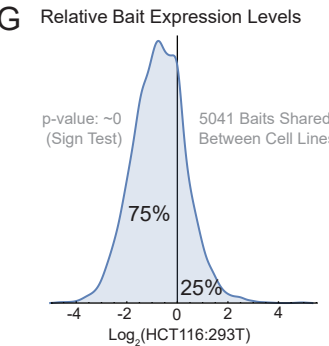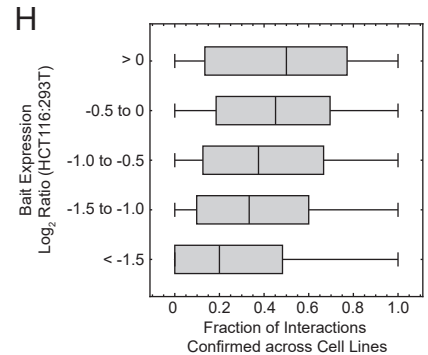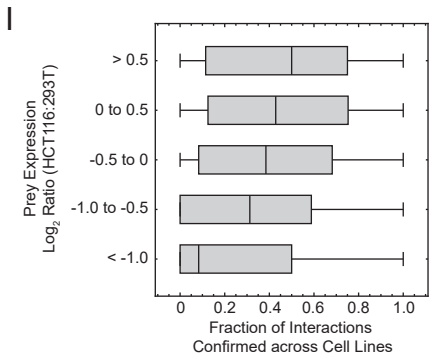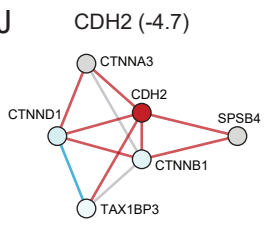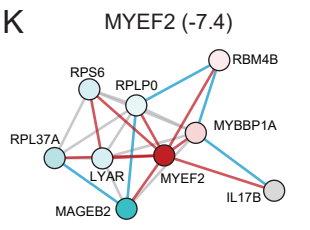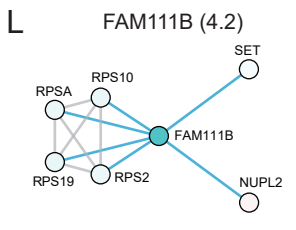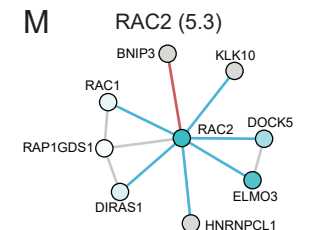

Key (Panels J - M): Log<sub>2</sub> Ratio (HCT116:293T) -5 0 5 No Quant. — 293T — Both — HCT116
