# Supplementary material
Source: PubMed Central journal article supplement (PMC8165030)

**A**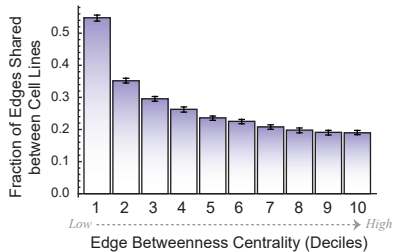**B**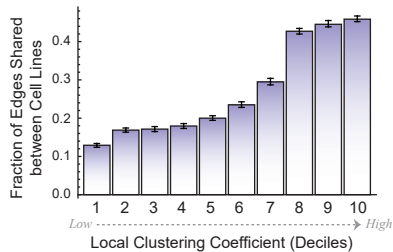**C**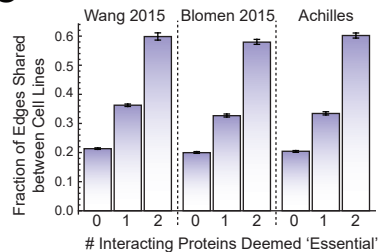**D**

Interaction Overlap versus Protein Expression Variability across 378 Human Cell Lines

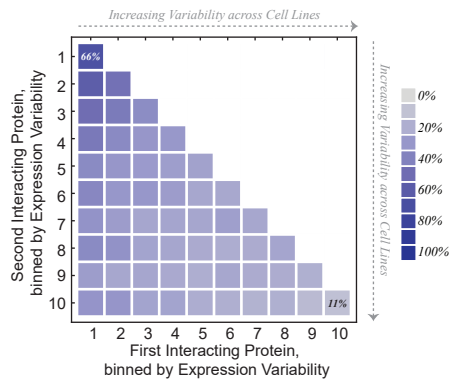**E**

Interaction Overlap versus Protein Expression Variability across 29 Human Tissues

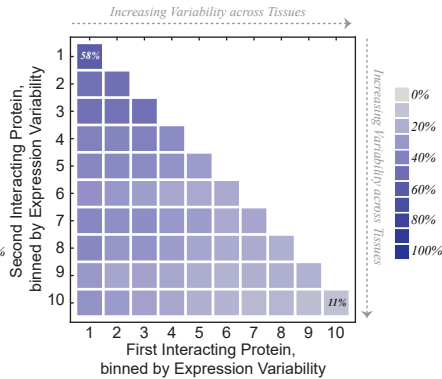**F**

Interaction Overlap versus Gene Expression Variability across 29 Human Tissues

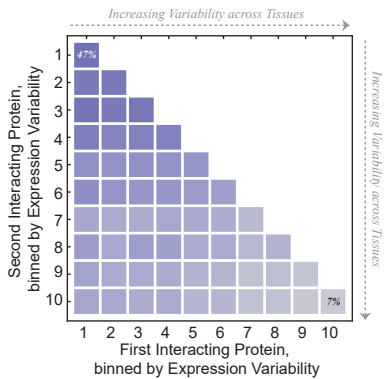

Supplement: NIHMS1699644-supplement-5.pdf [file NIHMS1699644-supplement-5.pdf]
