# Supplementary material
Source: PubMed Central journal article supplement (PMC8165030)

## A Combined BioPlex Network (293T + HCT116)

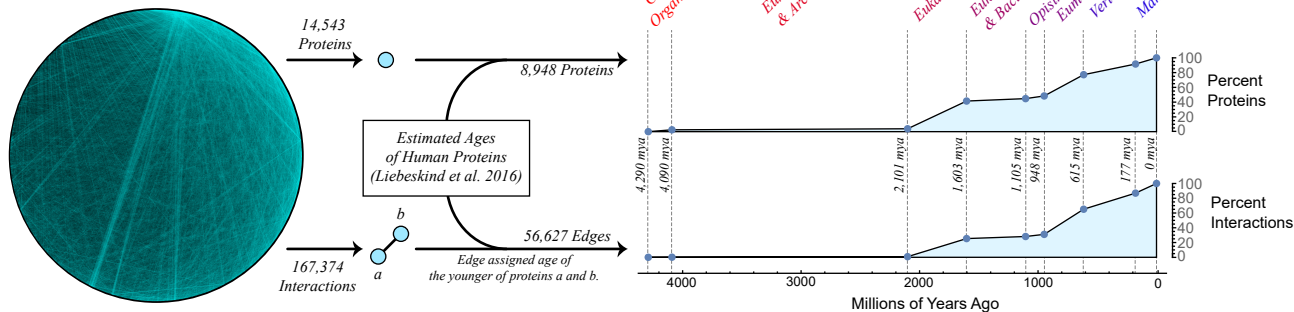

## B

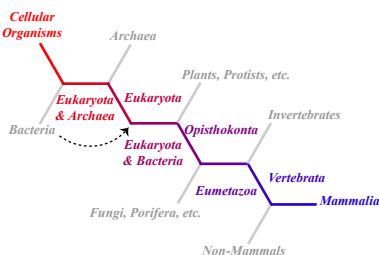

## C Interaction Overlap by Age

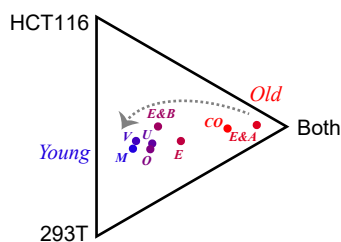

## D Interaction Overlap Reflects Protein Ages

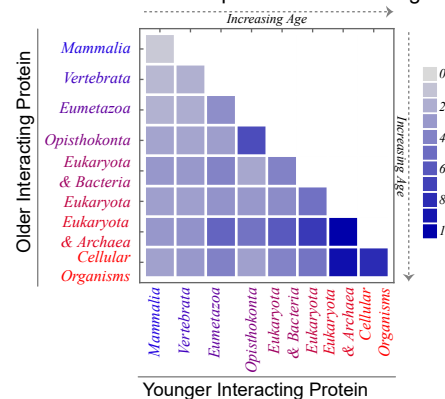

## E

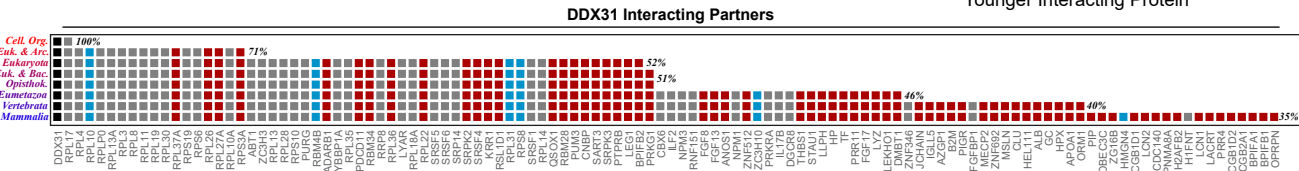

## F

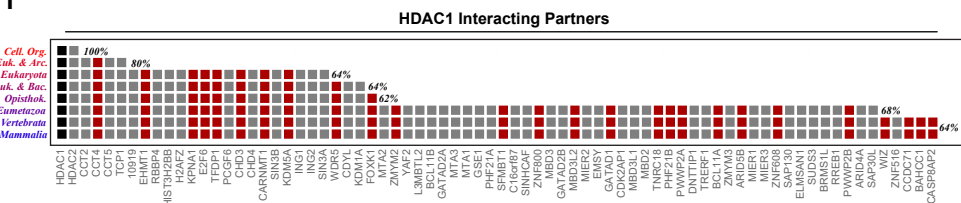

## G C15orf41 Interacting Partners

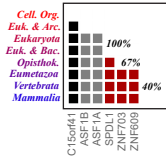

Supplement: NIHMS1699644-supplement-6.pdf [file NIHMS1699644-supplement-6.pdf]
